# Supplementary material
Source: publisher figshare collection journal article supplement (https://acs.figshare.com/ndownloader/files/4681879)
Supplement: Supplementary file 1 [file 4681879]

## SUPPORTING INFORMATION

### Mechanism of Electron and Hole Localization in Poly(dimethylsilane) radical ions

Hiroto TACHIKAWA\*

*Department of Materials Chemistry, Graduate School of Engineering, Hokkaido University,  
Sapporo 060-8628, Japan*

---

#### 1. Spin density distributions calculated by means of EHMO, ROHF and MP2 methods

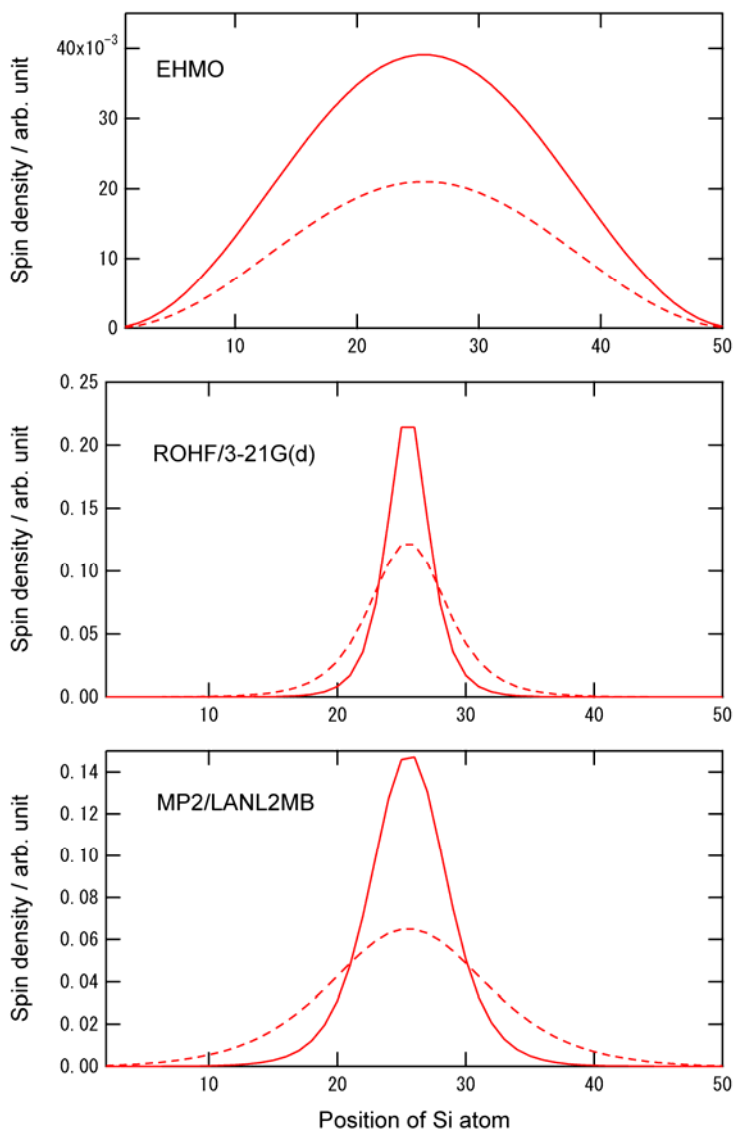

*Figure S1.* Spin densities of the hole and excess electron in  $\text{CH}_3(\text{Si}(\text{CH}_3)_2)_n\text{CH}_3$  ( $n=50$ ) calculated by means of extended Huckel MO (EHMO), ROHF/3-21G(d) and MP2/LANL2MB methods. Solid and dashed lines indicate spin densities of cation and anion radicals, respectively.

## 2. Spin density distributions calculated by means of DFT (B3LYP and PW91PW91) methods

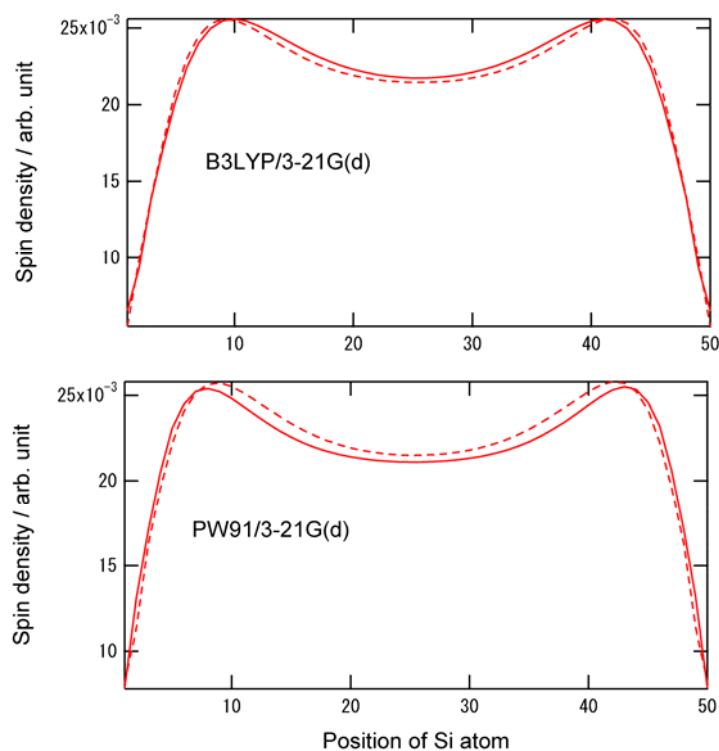

Figure S2. Spin densities of the hole and excess electron in  $\text{CH}_3(\text{Si}(\text{CH}_3)_2)_n\text{CH}_3$  ( $n=50$ ) calculated by means of B3LYP and PW91 methods. Solid and dashed lines indicate spin densities of cation and anion radicals, respectively.
